# Supplementary material for: The mechanism of two reversible phase transitions and dielectric anomalies in a single-component organic molecule 1-sulfo-4-dimethylamino-pyridinium
Source: Royal Society of Chemistry journal article supplement (doi:10.1039/d2ce01521h), 2022-12-21
Supplement: d2ce01521h1.pdf [file d2ce01521h1.pdf]

The mechanism of two reversible phase transitions and dielectric anomalies in a single-component organic molecule 1-sulfo-4-dimethylamino-pyridinium

Zihong Yu,<sup>a</sup> Xiuli You,<sup>b</sup> Wenqing Du,<sup>a</sup> Ziqin Peng,<sup>a</sup> Wenjing Guo,<sup>a</sup> Zhenhong Wei<sup>a,\*</sup>

<sup>a</sup> College of chemistry, Nanchang University, Nanchang, 330031, P. R. China.

<sup>b</sup> Jiangxi key laboratory of organic chemistry, Jiangxi science and technology normal university, Nanchang, 330013, China.

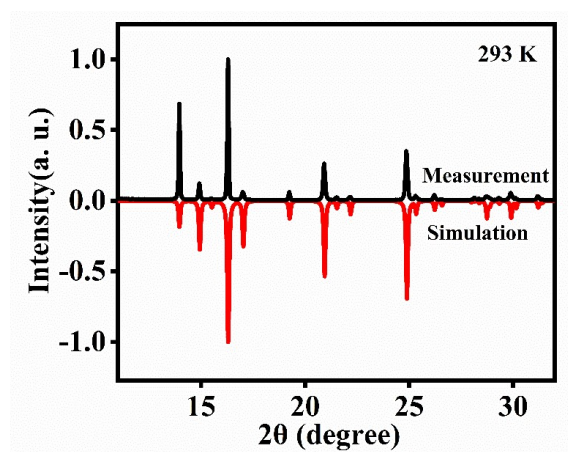

**Figure S1.** The powder X-ray diffraction pattern of compound **1** with the simulated one in red and the experimental one in black.

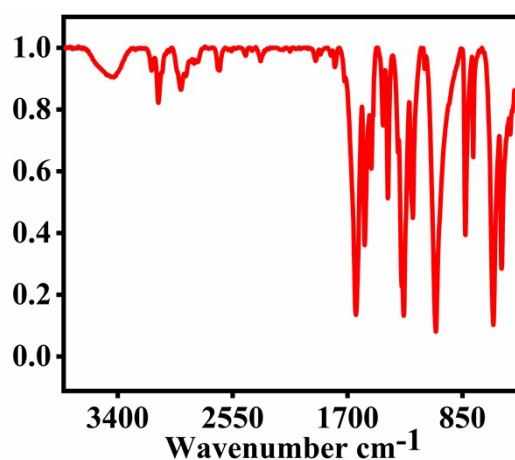

**Figure S2.** Infrared diagram of **1**.

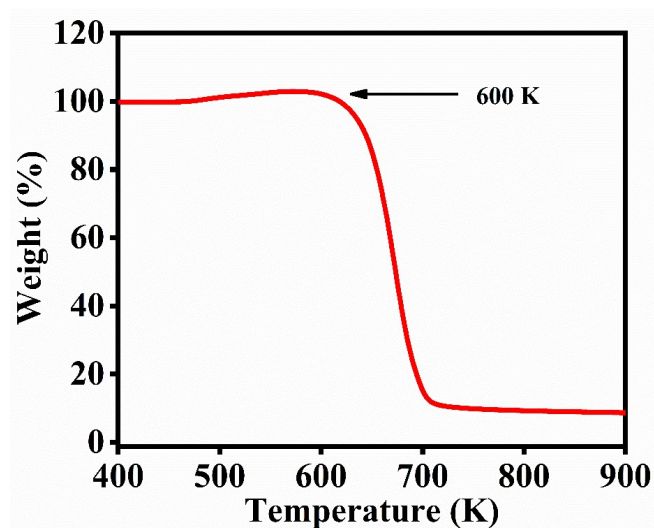

Figure S3. Thermogravimetric (TGA) curve of 1.

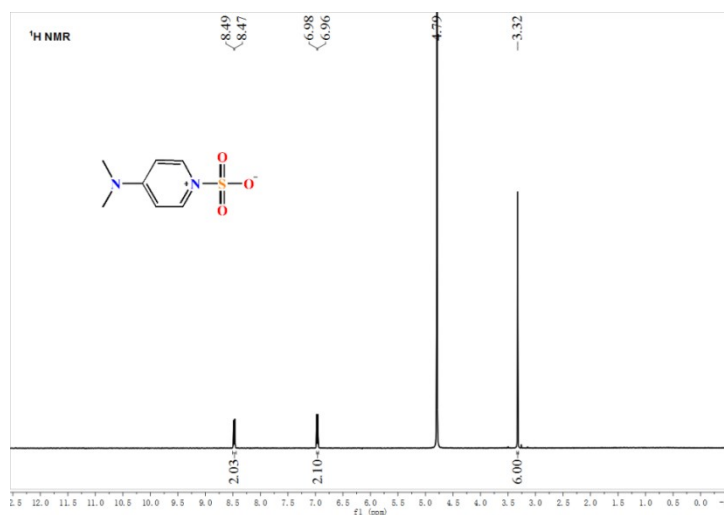

Figure S4.  $^1\text{H}$  NMR diagram of 1.

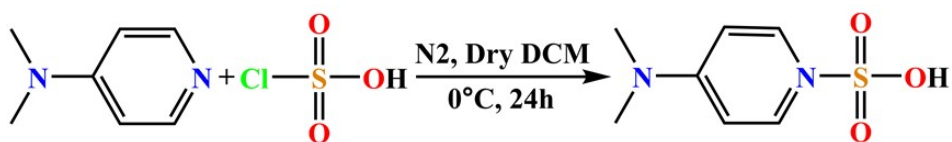

Figure S5. Synthesis and structural diagram of 1.

**Table S1.** Bond lengths [ $\text{\AA}$ ] and angles [ $^\circ$ ] for **1** (243 K).

|          |            |          |            |
|----------|------------|----------|------------|
| S1-O1    | 1.419(2)   | N2-C7    | 1.458(3)   |
| S1-O3    | 1.4278(18) | N2-C6    | 1.459(3)   |
| S1-O2    | 1.429(2)   | C1-C2    | 1.349(3)   |
| S1-N1    | 1.7697(19) | C2-C3    | 1.427(3)   |
| N1-C1    | 1.362(3)   | C3-C4    | 1.425(3)   |
| N1-C5    | 1.361(3)   | C4-C5    | 1.350(3)   |
| N2-C3    | 1.334(3)   |          |            |
| O1-S1-O3 | 116.22(13) | C3-N2-C6 | 121.2(2)   |
| O1-S1-O2 | 117.08(14) | C7-N2-C6 | 117.28(19) |
| O3-S1-O2 | 113.15(12) | C2-C1-N1 | 121.9(2)   |
| O1-S1-N1 | 102.05(10) | C1-C2-C3 | 120.5(2)   |
| O3-S1-N1 | 102.72(10) | N2-C3-C4 | 122.3(2)   |
| O2-S1-N1 | 102.58(10) | N2-C3-C2 | 121.6(2)   |
| C1-N1-C5 | 119.16(19) | C4-C3-C2 | 116.1(2)   |
| C1-N1-S1 | 121.63(15) | C5-C4-C3 | 120.3(2)   |
| C5-N1-S1 | 118.86(15) | C4-C5-N1 | 122.1(2)   |
| C3-N2-C7 | 121.46(19) |          |            |

**Table S2.** Bond lengths [ $\text{\AA}$ ] and angles [ $^\circ$ ] for **1**(293 K)

|                                      |          |                          |            |
|--------------------------------------|----------|--------------------------|------------|
| S1-N1                                | 1.756(4) | N1-C1                    | 1.363(3)   |
| S1-O2 <sup>1</sup>                   | 1.449(5) | N1-C1 <sup>1</sup>       | 1.363(3)   |
| S1-O2                                | 1.449(5) | N2-C3                    | 1.328(5)   |
| S1-O1 <sup>1</sup>                   | 1.477(5) | N2-C4                    | 1.464(4)   |
| S1-O1                                | 1.477(5) | N2-C4 <sup>1</sup>       | 1.464(4)   |
| S1-O2A <sup>1</sup>                  | 1.457(8) | C3-C2 <sup>1</sup>       | 1.420(3)   |
| S1-O2A                               | 1.457(8) | C3-C2                    | 1.420(3)   |
| S1-O1A                               | 1.409(7) | C1-C2                    | 1.344(5)   |
| S1-O1A <sup>1</sup>                  | 1.409(7) |                          |            |
| O2 <sup>1</sup> -S1-N1               | 102.0(3) | O1A <sup>1</sup> -S1-N1  | 109.2(7)   |
| O2-S1-N1                             | 102.0(3) | O1A-S1-O2A               | 59.1(9)    |
| O2-S1-O2 <sup>1</sup>                | 108.2(6) | O1A <sup>1</sup> -S1-O2A | 122.6(11)  |
| O2 <sup>1</sup> -S1-O1 <sup>1</sup>  | 89.4(4)  | O1A-S1-O1A <sup>1</sup>  | 140.9(13)  |
| O2-S1-O1 <sup>1</sup>                | 147.4(4) | C1-N1-S1                 | 120.90(18) |
| O2 <sup>1</sup> -S1-O1               | 147.4(4) | C1 <sup>1</sup> -N1-S1   | 120.90(18) |
| O2-S1-O1                             | 89.4(4)  | C1-N1-C1 <sup>1</sup>    | 117.9(4)   |
| O2 <sup>1</sup> -S1-O2A <sup>1</sup> | 22.0(8)  | C3-N2-C4                 | 121.5(2)   |
| O2-S1-O2A <sup>1</sup>               | 88.7(9)  | C3-N2-C4 <sup>1</sup>    | 121.5(2)   |
| O1 <sup>1</sup> -S1-N1               | 100.7(2) | C4-N2-C4 <sup>1</sup>    | 116.9(4)   |
| O1-S1-N1                             | 100.7(2) | N2-C3-C2                 | 122.16(18) |

|                         |          |                       |            |
|-------------------------|----------|-----------------------|------------|
| O1-S1-O1 <sup>1</sup>   | 63.5(6)  | N2-C3-C2 <sup>1</sup> | 122.15(18) |
| O2A <sup>1</sup> -S1-N1 | 97.0(9)  | C21-C3-C2             | 115.7(4)   |
| O2A-S1-N1               | 97.0(9)  | C2-C1-N1              | 122.5(3)   |
| O1A-S1-N1               | 109.2(7) | C1-C2-C3              | 120.7(3)   |

**Table S3.** Bond lengths [Å] and angles [°] for **1** (328 K)

|                                     |           |                         |            |
|-------------------------------------|-----------|-------------------------|------------|
| S1-N1                               | 1.776(3)  | N1-C1                   | 1.349(3)   |
| S1-O2                               | 1.478(6)  | N1-C1 <sup>1</sup>      | 1.349(3)   |
| S1-O2 <sup>1</sup>                  | 1.478(6)  | N2-C3                   | 1.326(5)   |
| S1-O1 <sup>1</sup>                  | 1.480(5)  | N2-C4 <sup>1</sup>      | 1.455(3)   |
| S1-O1                               | 1.480(5)  | N2-C4                   | 1.455(3)   |
| S1-O2A                              | 1.466(12) | C3-C2                   | 1.419(3)   |
| S1-O2A <sup>1</sup>                 | 1.466(12) | C3-C2 <sup>1</sup>      | 1.419(3)   |
| S1-O1A                              | 1.311(9)  | C1-C2                   | 1.347(4)   |
| S1-O1A <sup>1</sup>                 | 1.311(9)  | O2A-O1A                 | 1.382(18)  |
| S1-N1                               | 1.776(3)  | N1-C1                   | 1.349(3)   |
| O2 <sup>1</sup> -S1-N1              | 101.4(3)  | O1A1-S1-O2A             | 121.7(9)   |
| O2-S1-N1                            | 101.4(3)  | O1A-S1-O1A <sup>1</sup> | 143.8(11)  |
| O2-S1-O2 <sup>1</sup>               | 107.1(5)  | C1-N1-S1                | 120.19(16) |
| O2-S1-O1 <sup>1</sup>               | 149.2(4)  | C1 <sup>1</sup> -N1-S1  | 120.19(16) |
| O2-S1-O1                            | 89.4(4)   | C1-N1-C1 <sup>1</sup>   | 119.4(3)   |
| O2 <sup>1</sup> -S1-O1              | 149.2(4)  | C3-N2-C4 <sup>1</sup>   | 121.44(19) |
| O2 <sup>1</sup> -S1-O1 <sup>1</sup> | 89.4(4)   | C3-N2-C4                | 121.44(19) |
| O1-S1-N1                            | 100.5(2)  | C41-N2-C4               | 117.0(4)   |
| O1 <sup>1</sup> -S1-N1              | 100.5(2)  | N2-C3-C2 <sup>1</sup>   | 122.14(16) |
| O1-S1-O1 <sup>1</sup>               | 65.5(5)   | N2-C3-C2                | 122.15(16) |
| O2A-S1-N1                           | 98.1(8)   | C2-C3-C2 <sup>1</sup>   | 115.7(3)   |
| O2A <sup>1</sup> -S1-N1             | 98.1(8)   | C2-C1-N1                | 121.8(2)   |
| O1A <sup>1</sup> -S1-N1             | 107.7(5)  | C1-C2-C3                | 120.6(2)   |
| O1A-S1-N1                           | 107.7(5)  | O1A-O2A-S1              | 54.7(6)    |
| O1A-S1-O2A                          | 59.4(7)   | S1-O1A-O2A              | 65.9(7)    |
